# Supplementary material
Source: PubMed Central journal article supplement (PMC4549208)
Supplement: NIHMS669820-supplement-3.pdf [file NIHMS669820-supplement-3.pdf]

**Table S1.** Subgroup Results: Event Rates by Treatment Arm and Selected Subgroups, with Treatment by Subgroup Interactions

| Subgroup                  | Nocturnal HD       |                  |                       |                         | Conventional HD    |                  |                       |                         |
|---------------------------|--------------------|------------------|-----------------------|-------------------------|--------------------|------------------|-----------------------|-------------------------|
|                           | Number of Subjects | Number of Events | Total Years Follow-up | Deaths Per Patient Year | Number of Subjects | Number of Events | Total Years Follow-up | Deaths Per Patient Year |
| Age ≤ 50 years            | 19                 | 4                | 66.27                 | 0.060                   | 15                 | 2                | 54.04                 | 0.037                   |
| Age > 50 years            | 26                 | 10               | 74.62                 | 0.134                   | 27                 | 3                | 100.5                 | 0.030                   |
| Male                      | 29                 | 9                | 92.89                 | 0.097                   | 28                 | 4                | 94.82                 | 0.042                   |
| Female                    | 16                 | 5                | 48.00                 | 0.104                   | 14                 | 1                | 59.72                 | 0.017                   |
| Non-Black                 | 33                 | 11               | 102.2                 | 0.108                   | 30                 | 5                | 105.7                 | 0.047                   |
| Black                     | 12                 | 3                | 38.68                 | 0.078                   | 11                 | 0                | 45.33                 | 0.000                   |
| LV Mass ≤ 132 (g)         | 24                 | 7                | 71.52                 | 0.098                   | 18                 | 2                | 70.98                 | 0.028                   |
| LV Mass > 132 (g)         | 21                 | 7                | 69.37                 | 0.101                   | 24                 | 3                | 83.56                 | 0.036                   |
| Urine volume ≤ 500 ml/day | 27                 | 11               | 78.31                 | 0.140                   | 19                 | 1                | 77.07                 | 0.013                   |
| Urine volume > 500 ml/day | 18                 | 3                | 62.58                 | 0.048                   | 23                 | 4                | 77.47                 | 0.052                   |
| Urine volume ≤ 100 ml/day | 13                 | 5                | 42.18                 | 0.119                   | 11                 | 0                | 46.78                 | 0.000                   |
| Urine volume > 100 ml/day | 32                 | 9                | 98.72                 | 0.091                   | 31                 | 5                | 107.8                 | 0.046                   |
| < 4 Years vintage         | 28                 | 7                | 93.66                 | 0.075                   | 30                 | 4                | 108.2                 | 0.037                   |
| ≥ 4 Years vintage         | 17                 | 7                | 47.23                 | 0.148                   | 12                 | 1                | 46.32                 | 0.022                   |
| American center           | 29                 | 11               | 86.03                 | 0.128                   | 25                 | 3                | 93.34                 | 0.032                   |
| Canadian center           | 16                 | 3                | 54.86                 | 0.055                   | 17                 | 2                | 61.20                 | 0.033                   |
| Experienced center        | 33                 | 9                | 106.4                 | 0.085                   | 33                 | 4                | 113.6                 | 0.035                   |
| Inexperienced center      | 12                 | 5                | 34.51                 | 0.145                   | 9                  | 1                | 40.91                 | 0.024                   |

There were no statistically significant interactions between randomized treatment assignment and any of the subgroup factors ( $p > 0.15$  for each subgroup factor). One patient who listed race as unknown is excluded from the conventional arm data.
