# Supplementary material
Source: PubMed Central journal article supplement (PMC4549208)
Supplement: NIHMS669820-supplement-5.pdf [file NIHMS669820-supplement-5.pdf]

**Table S3.** Time-Dependent Cox Regressions Relating Mortality to Alternative Measures of the Dialysis Treatment Regimen Over the Preceding 6 or 12 Months

| Parameter                                                                          | Treatment Regimen Averaged Over 12 Months |             |             |         | Treatment Regimen Averaged Over 6 Months |             |             |         |
|------------------------------------------------------------------------------------|-------------------------------------------|-------------|-------------|---------|------------------------------------------|-------------|-------------|---------|
|                                                                                    | HR                                        | Lower Limit | Upper Limit | P-Value | HR                                       | Lower Limit | Upper Limit | P-Value |
| Hazard Ratio per Each Additional Treatment Per Week, As Continuous Variable        | 1.35                                      | 0.84        | 2.18        | 0.21    | 1.13                                     | 0.72        | 1.78        | 0.59    |
| Hazard Ratio per Each Additional Hour Per Week, As Continuous Variable             | 1.03                                      | 0.98        | 1.07        | 0.27    | 1.00                                     | 0.96        | 1.05        | 0.88    |
| Hazard Ratio For > 4.5 Treatment Per Week, As Categorical Variable                 | 3.36                                      | 1.16        | 9.70        | 0.03    | 1.20                                     | 0.45        | 3.24        | 0.71    |
| Hazard Ratio For > 4.5 Treatments AND > 27 Hours Per Week, As Categorical Variable | 3.06                                      | 1.11        | 8.43        | 0.03    | 1.19                                     | 0.44        | 3.21        | 0.74    |
| Hazard Ratio For > 27 Hours Per Week, As Categorical Variable                      | 2.36                                      | 0.85        | 6.54        | 0.10    | 0.90                                     | 0.33        | 2.45        | 0.83    |

\* Results of separate time-dependent Cox regressions with follow-up time censored at renal transplantation.
