# Supplementary material
Source: PubMed Central journal article supplement (PMC4549208)

**Figure S1.** Relation of treatment frequency by weekly time by period of trial.

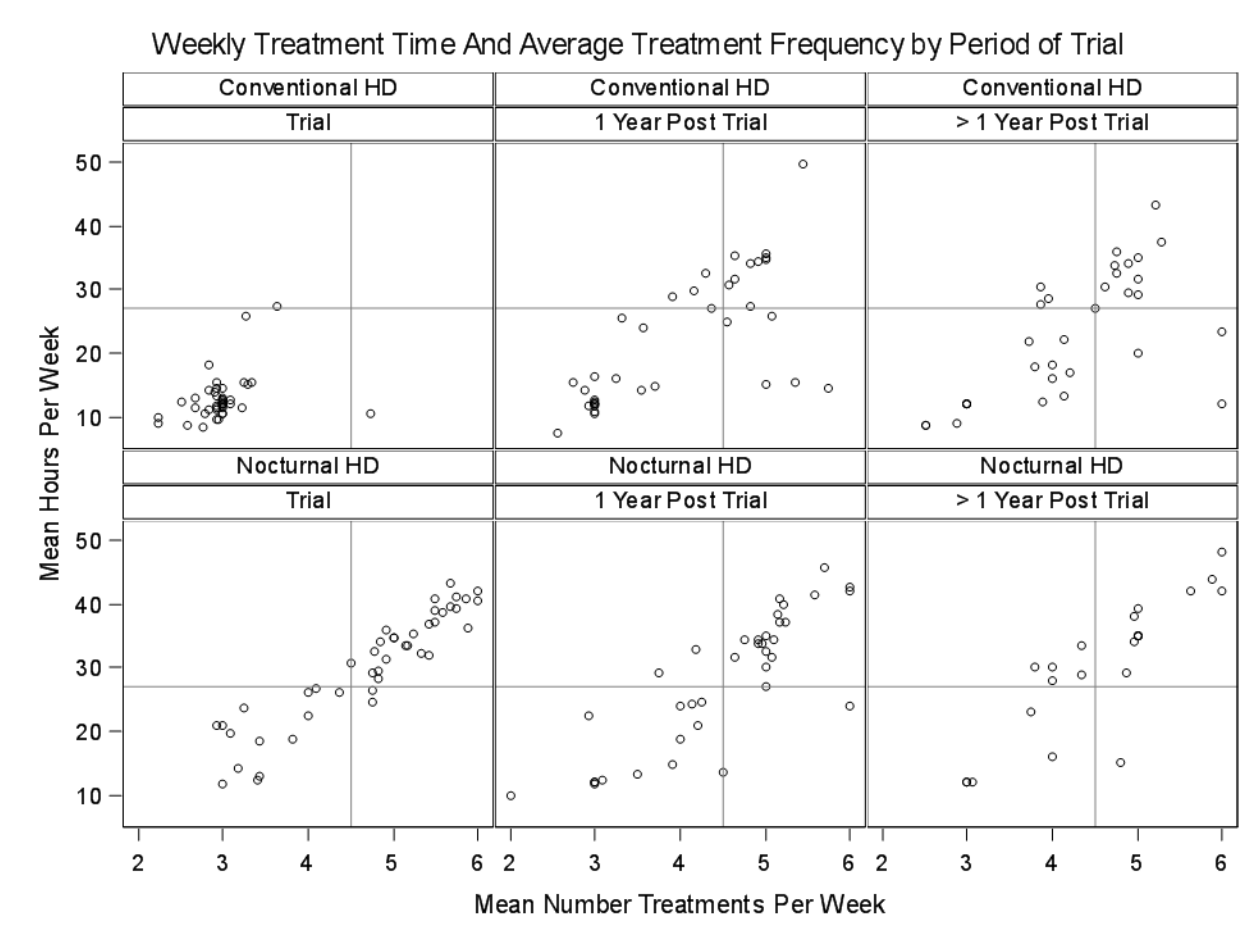

Supplement: NIHMS669820-supplement-1.pdf [file NIHMS669820-supplement-1.pdf]
